# Supplementary material for: miR-26a prevents neural stem cells from apoptosis via β-catenin signaling pathway in cardiac arrest-induced brain damage
Source: PubMed Central journal article supplement (PMC6522814; doi:10.1042/bsr20181635), 2019-05-14
Supplement: BSR-2018-1635_suppS1.pdf [file BSR-2018-1635_suppS1.pdf]

**Table S1** Primer sequences of miRNA qRT-PCR

| Gene name  | Primer sequence              |
|------------|------------------------------|
| miR-26a 3p | 5'-CCCTTCTTGGTACTTGCACAAA-3' |
| miR-26a 5p | 5'-CCAAGGTCCAGGATAGGCTAAA-3' |
| U6         | 5'-ACGCAAATTCGTGAAGCGTT-3'   |

**Table S2** Primer sequences of mRNA qRT-PCR

| Gene name                | Primer sequence                 |
|--------------------------|---------------------------------|
| $\beta$ -actin forward   | 5'-GGAGATTACTGCCCTGGCTCCTA-3'   |
| $\beta$ -actin reverse   | 5'-GACTCATCGTACTCCTGCTTGCTG-3'  |
| Cyclin D1 forward        | 5'- GATTGTGCCATCCATGCGGA-3'     |
| Cyclin D1 reverse        | 5'- AGACCTCCTCTTCGCACTTC-3'     |
| $\beta$ -catenin forward | 5'-GTCTGAGGACAAGCCACAGGACTAC-3' |
| $\beta$ -catenin reverse | 5'-AATGTCCAGTCCGAGATCAGCA-3'    |

**Table S3** Wild-type and mutant 3'-UTR of GSK3 $\beta$ 

| Gene name               | Primer sequence                                                                                                                                |
|-------------------------|------------------------------------------------------------------------------------------------------------------------------------------------|
| GSK3 $\beta$ -3'UTR-wt  | 5'-acagccccaagtagccagctgcgaggggaagaccagcact <b>tacttgagt</b> gccactcagcaaacactggtcacggttgaaagaaaattaaaaagaggaaaacaaaaacaaa<br>aacaaaaaacccc-3' |
| GSK3 $\beta$ -3'UTR-mut | 5'-acagccccaagtagccagctgcgaggggaagaccagcact <b>atgaact</b> gtgccactcagcaaacactggtcacggttgaaagaaaattaaaaagaggaaaacaaaaacaaa<br>aacaaaaaacccc-3' |

**Table S4** Criteria of neurologic deficit scores

| Name of index                                                                                           | level                                       | score |
|---------------------------------------------------------------------------------------------------------|---------------------------------------------|-------|
| 1 Level of consciousness (spontaneous attention to environment and reaction to pinching of ear or tail) | attention good and brisk response           | 0     |
|                                                                                                         | sluggish response and no attention          | 50    |
|                                                                                                         | no response                                 | 100   |
| 2 Respiration (breathing frequency)                                                                     | normal or higher (over 80/min)              | 0     |
|                                                                                                         | decreased                                   | 50    |
|                                                                                                         | apnea                                       | 100   |
| 3 Cranial nerve function                                                                                |                                             |       |
| 3.1 Cornea reflex (touch center of cornea with hemostat)                                                | brisk                                       | 0     |
|                                                                                                         | sluggish                                    | 20    |
|                                                                                                         | absent                                      | 40    |
| 3.2 Carinal reflex or gag reflex (stimulation with catheter)                                            | brisk                                       | 0     |
|                                                                                                         | sluggish                                    | 15    |
|                                                                                                         | absent                                      | 30    |
| 3.3 Auditory reflex (bang metal cup with clamp)                                                         | brisk                                       | 0     |
|                                                                                                         | sluggish                                    | 15    |
|                                                                                                         | absent                                      | 30    |
| 4 Motor and sensory function (righting reflex)                                                          | turn spontaneously                          | 0     |
|                                                                                                         | sluggish, partly                            | 50    |
|                                                                                                         | no turning attempts                         | 100   |
| 5 Behavior (spontaneous or stimulated)                                                                  | moving body, forward movements, walking     | 0     |
|                                                                                                         | movements of the head, looking around       | 50    |
|                                                                                                         | no movements except breathing or not at all | 100   |

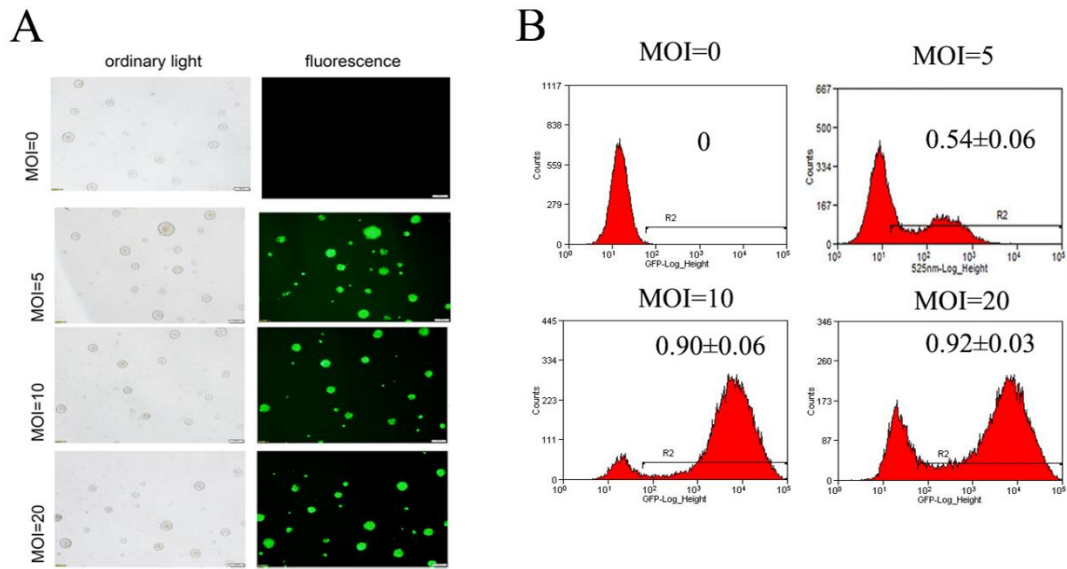

**Figure S1** The transfection rate of the lentivirus.

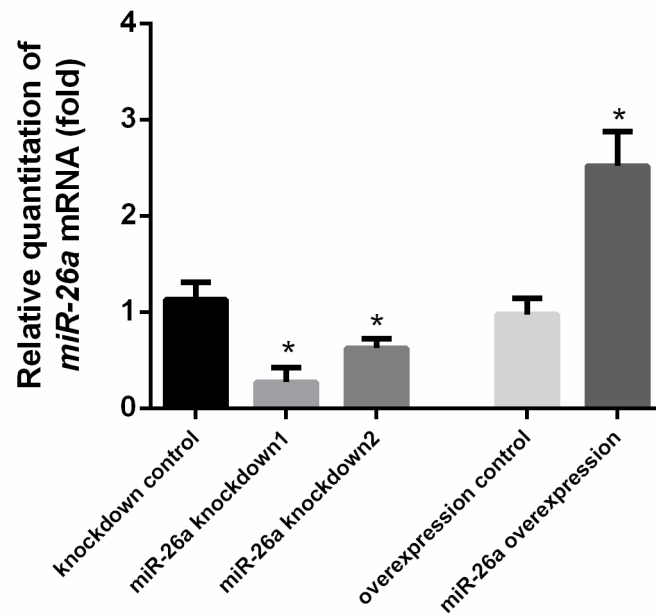

**Figure S2** The mRNA expression of miR-26a in different groups.
